# Supplementary material
Source: Springer Nature journal article supplement (https://www.springermedizin.de/resource/supplementary/12935_2009_229_MOESM3_ESM.pdf/9541364)

A

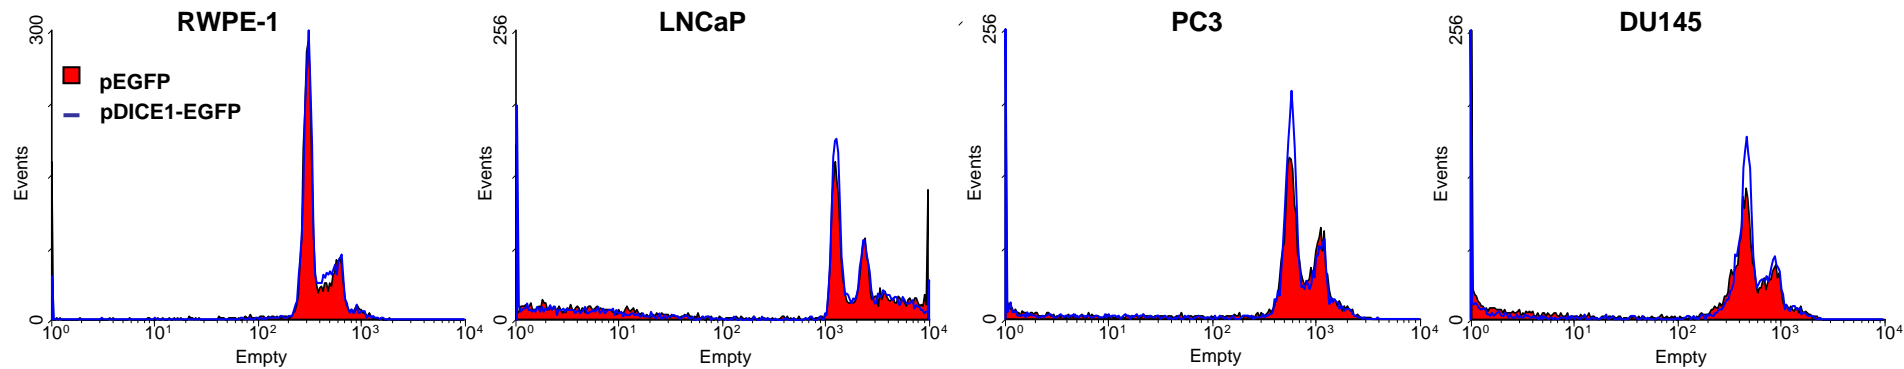

B

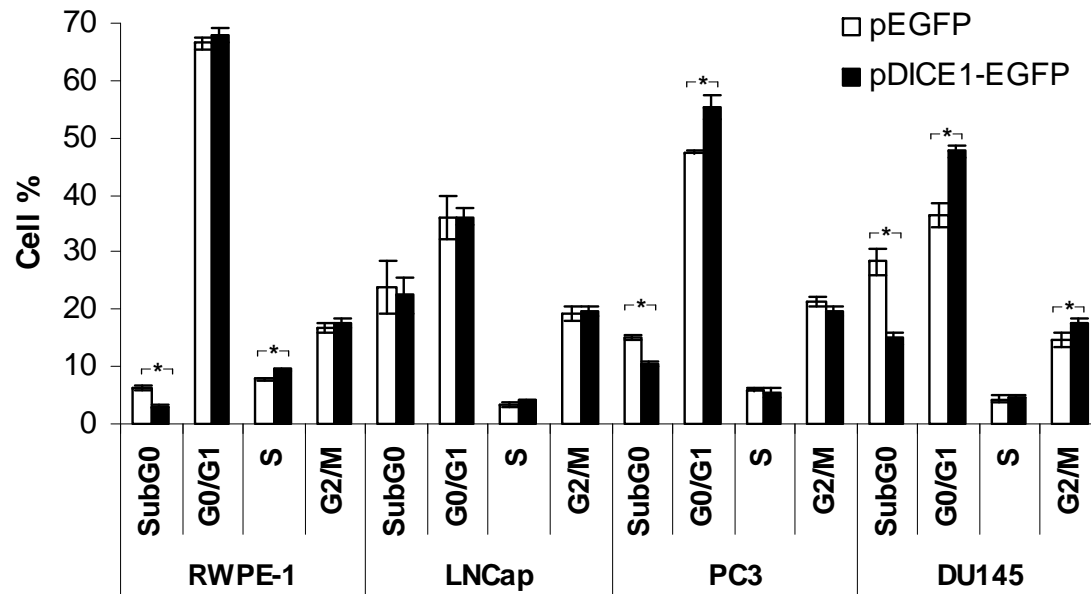

Supplement: MOESM3 [file 9541364]
